# Supplementary material for: Between China and South Asia: A Middle Asian corridor of crop dispersal and agricultural innovation in the Bronze Age
Source: PubMed Central journal article supplement — Holocene. 2016 Jun 1;26(10):1541–55. doi: 10.1177/0959683616650268 (PMC5125436; doi:10.1177/0959683616650268), 2016-06-01
Supplement: 650268_Supplementary_Material.pdf [file 650268_Supplementary_Material.pdf]

## FIELD NAME

## LEGEND

|                            |                                                                                                                                    |
|----------------------------|------------------------------------------------------------------------------------------------------------------------------------|
| Site No.                   |                                                                                                                                    |
| Main Region                |                                                                                                                                    |
| Latitude                   | Decimal degrees                                                                                                                    |
| Longitude                  | Decimal degrees                                                                                                                    |
| GeoRef Quality             | 1= guess/within ~100km; 2= modern town/right district/ within ~10-20km; 3= accurate/within ~1-2 km                                 |
| Sample Quality             | i=impressions; 1=haphazar/ unquantified 2=multiple samples not quantified 3=systematic sample (quantified sample by sample)        |
| Dating Quality             | ass= associated culture; C-14: radiocarbon on charcoal/bone; AMS: direct dating on crop                                            |
| Broad Cultural Period      |                                                                                                                                    |
| Start Date BC/AD           | BC = negative numbers; AD= positive numbers                                                                                        |
| Finish Date BC/AD          |                                                                                                                                    |
| Est. Date Median BC/AD     | Perferred is summed probability calibration of all dates using the 1isigma as start and end date, with median calculated therefrom |
| Triticum monococum         | Tm2= 2 grained einkorn w=wild / ?=uncertain identification                                                                         |
| Triticum dicocum           | Tti = new type/ timopheevi type/ "striate emmeroid" w=wild / ?=uncertain identification                                            |
| Triticum turgidum/aestivum | Tta= Triticum turgidum/durum/aestivum = free-threshing wheat based on grain only; includes w=wild / ?=uncertain identification     |
| T. durum                   | Td= T. turgidum/durum, free-threshing tetraploid based on positive identification of rachis/ a w=wild / ?=uncertain identification |
| T. aestivum                | Ta= free threshing hexaploid wheat based on positive identification of rachis/ aDNA w=wild / ?=uncertain identification            |
| Hordeum vulgare            | Hv= Hordeum vulgare (any/all types) w=wild / ?=uncertain identification                                                            |
| Oryza                      | Ors= Oryza sativa, Org= Oryza glaberrima (West Africa only) w=wild / ?=uncertain identification                                    |
| Panicum miliaceum          | Pa w=wild / ?=uncertain identification                                                                                             |
| Setaria italica            | Se w=wild / ?=uncertain identification                                                                                             |
| Pennisetum miliaceum       | Pe w=wild / ?=uncertain identification                                                                                             |
| Sorghum bicolor            | So w=wild / ?=uncertain identification                                                                                             |
| Panicum sumatrense         |                                                                                                                                    |
| Paspalum                   |                                                                                                                                    |
| Setaria spp.               |                                                                                                                                    |
| Avena                      |                                                                                                                                    |
| Secale sp.                 |                                                                                                                                    |
| Lens                       |                                                                                                                                    |
| Cicer                      |                                                                                                                                    |
| Pisum                      | Pis = P. sativum; Piab= P. abyssinicum                                                                                             |
| Lathyrus                   | may include Lathyrus aphaca                                                                                                        |
| Glycine max/soja           |                                                                                                                                    |
| Linum usitatissimum        |                                                                                                                                    |
| Cannabis                   |                                                                                                                                    |
| Carthamus                  |                                                                                                                                    |
| Sesamum                    |                                                                                                                                    |
| Amygdalus communis         |                                                                                                                                    |
| Amygdalus persica          |                                                                                                                                    |
| Armeniaca vulgaris         |                                                                                                                                    |
| Reference                  |                                                                                                                                    |
